# Supplementary material
Source: MDPI journal article supplement (https://www.mdpi.com/2311-553X/6/1/7)
Supplement: s1 [file s1]

# Supplementary FIGURE 1

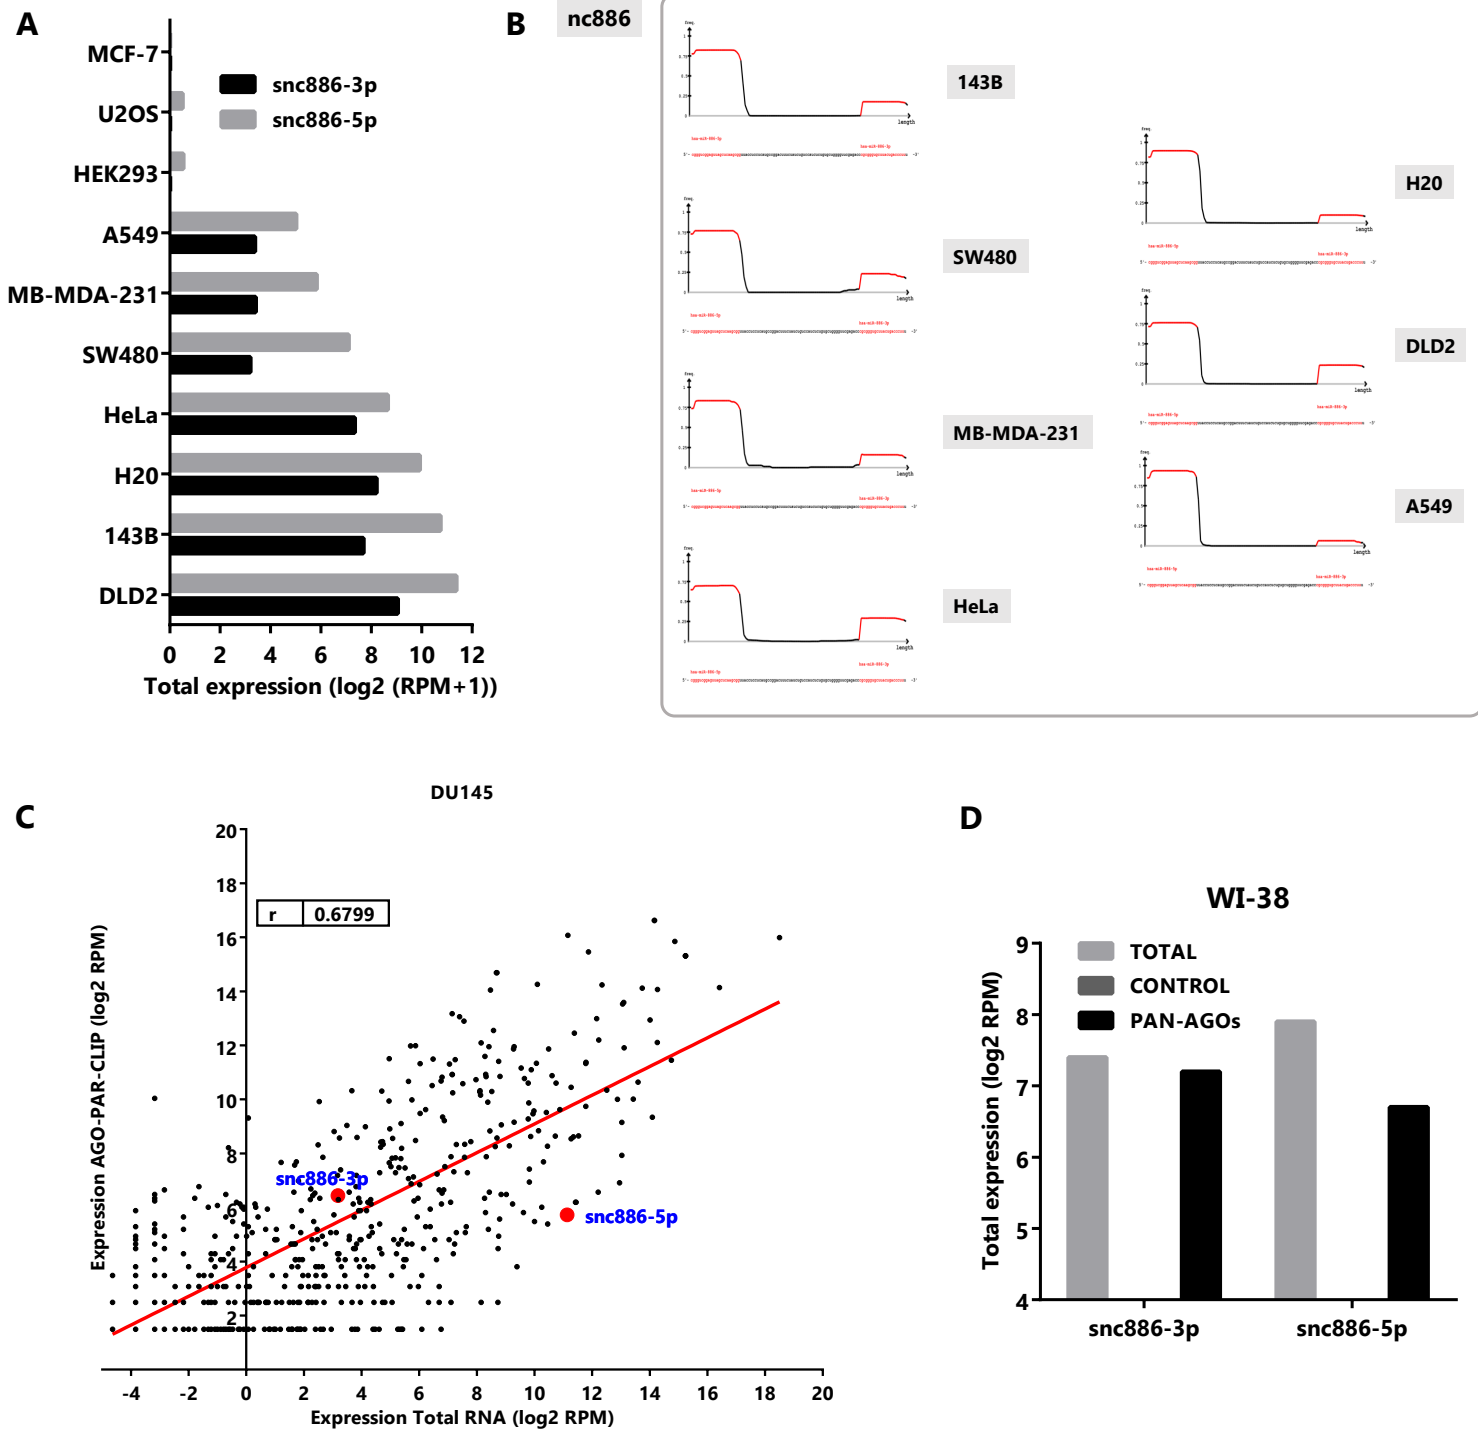

## Supplementary FIGURE 2

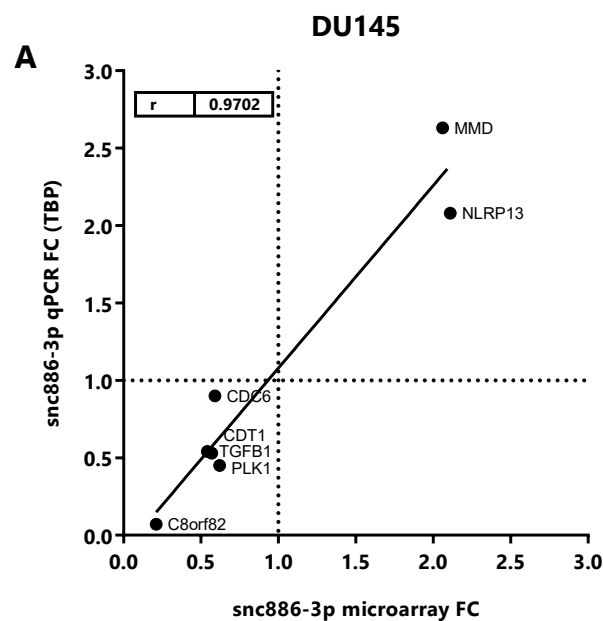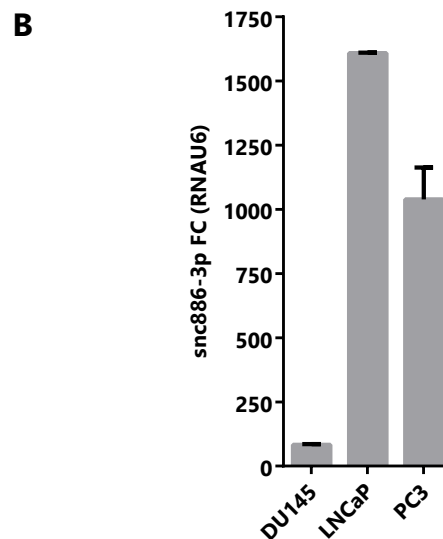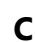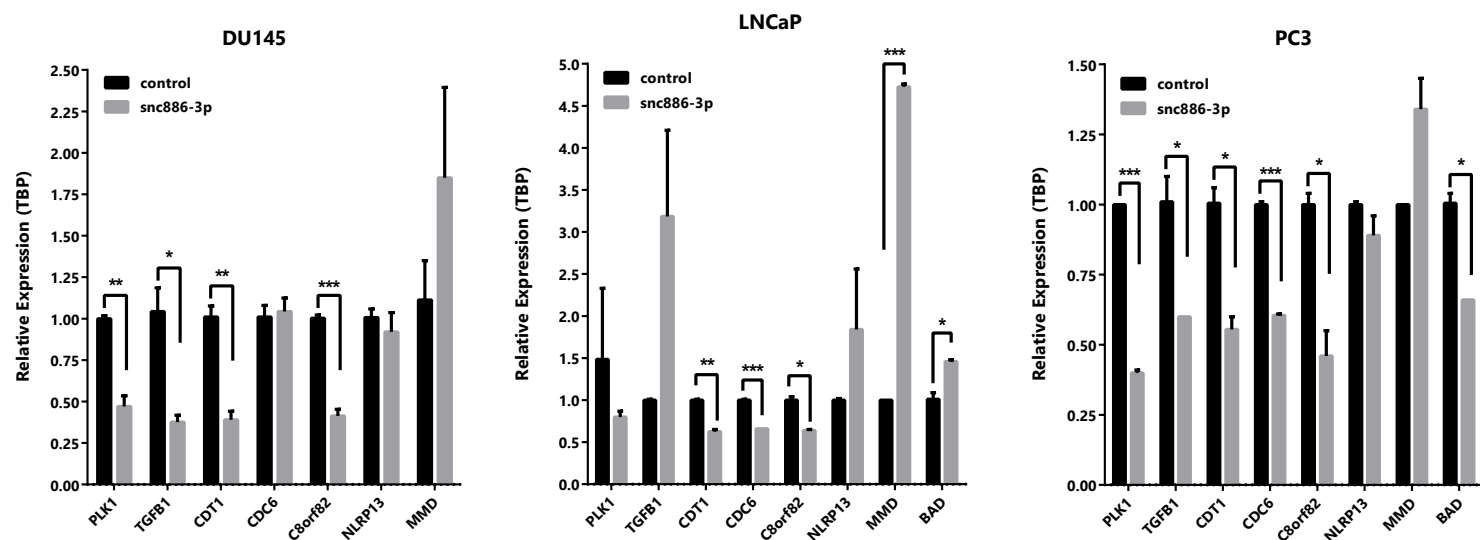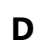

**Title:** Cell Cycle  
**Last modified:** 2/22/2013  
**Organism:** Homo sapiens

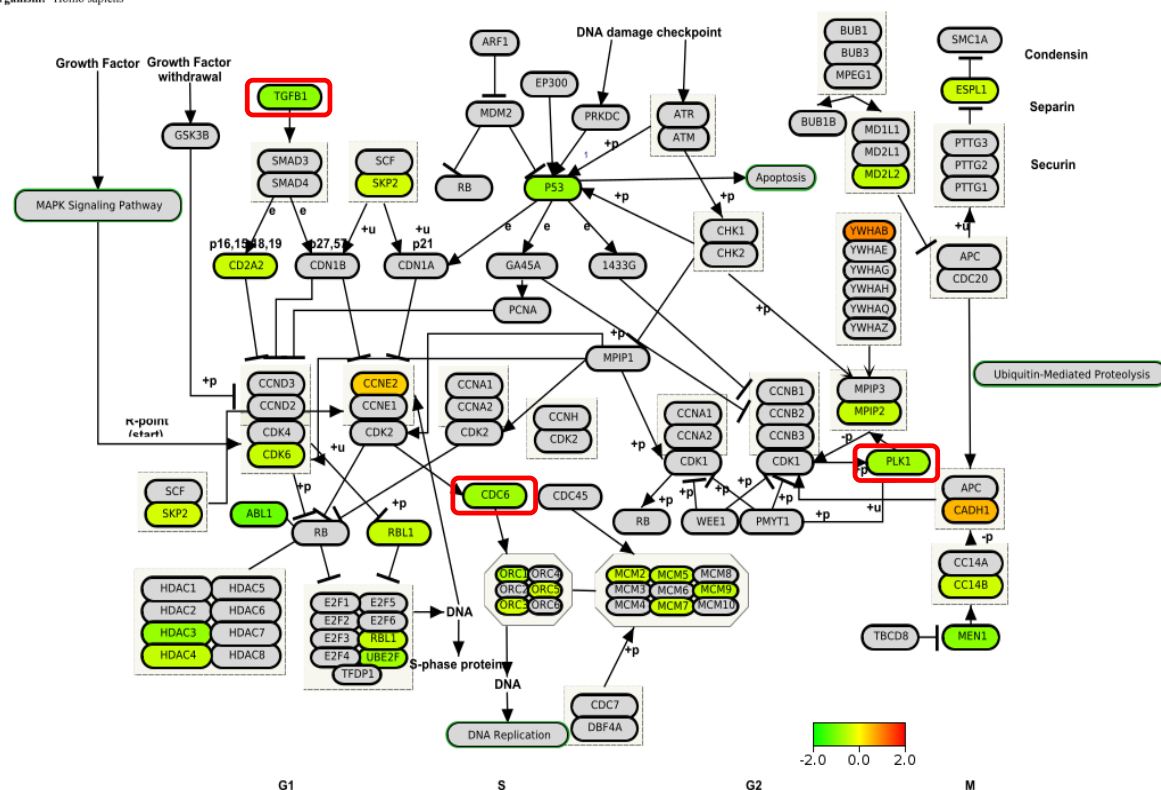

# Supplementary Figure 3

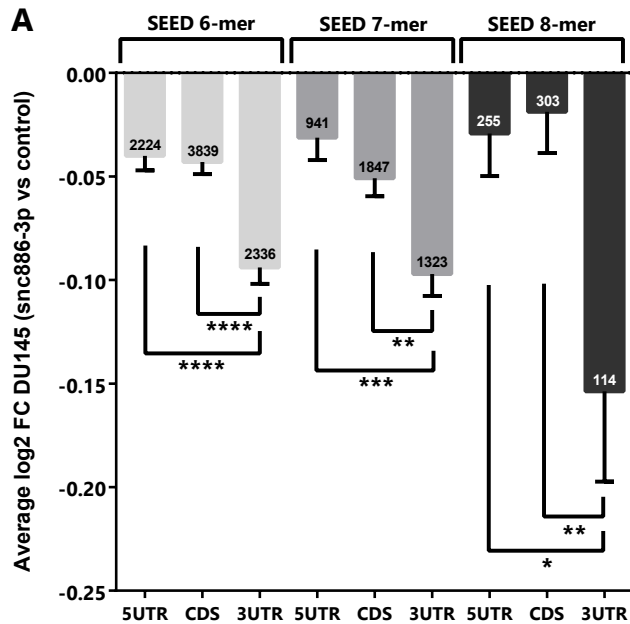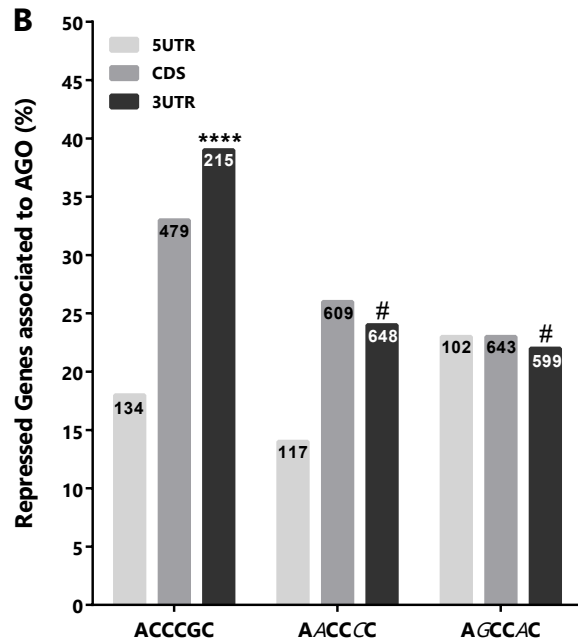

# Supplementary FIGURE 4

**A**

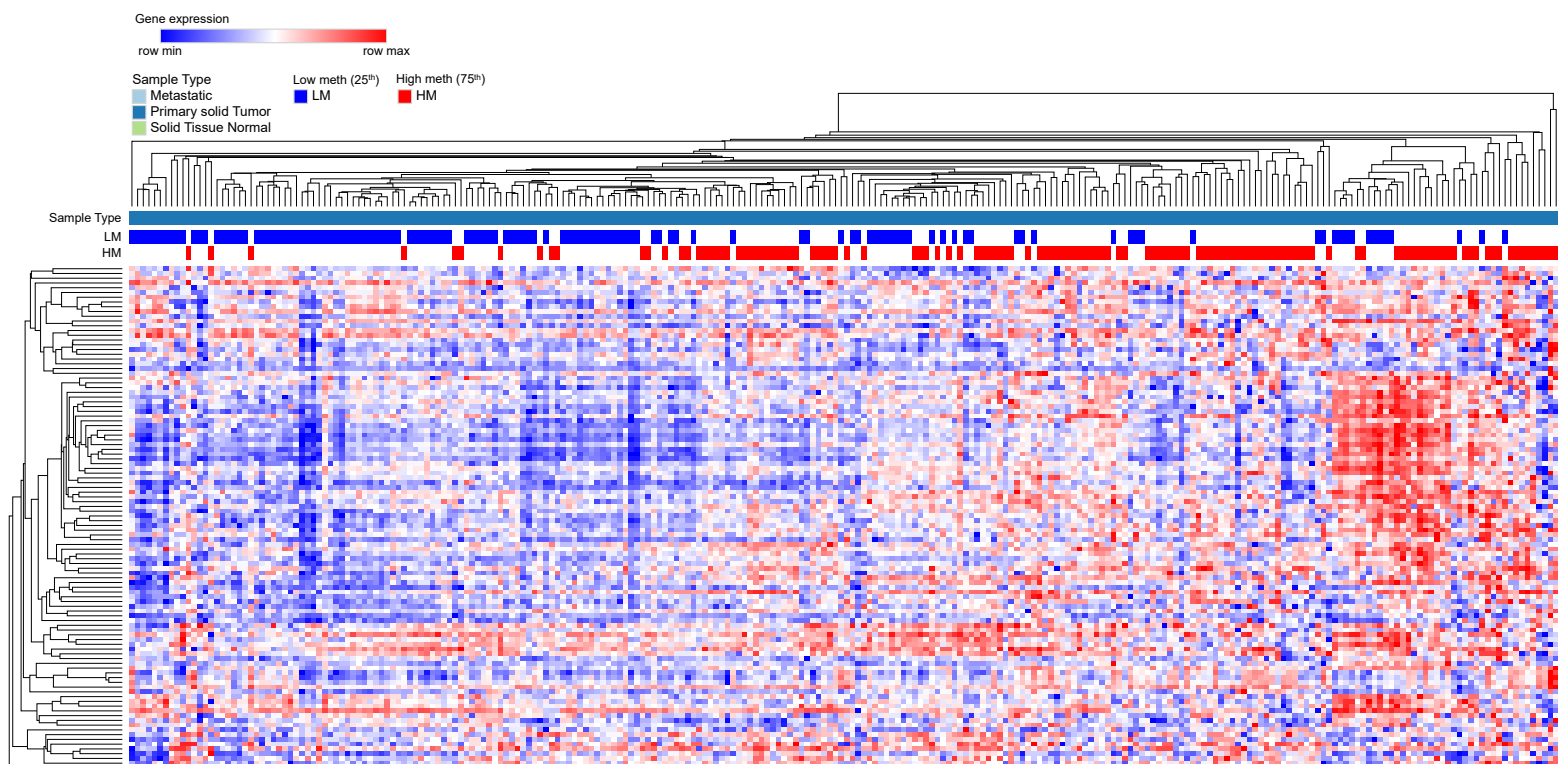

**B**

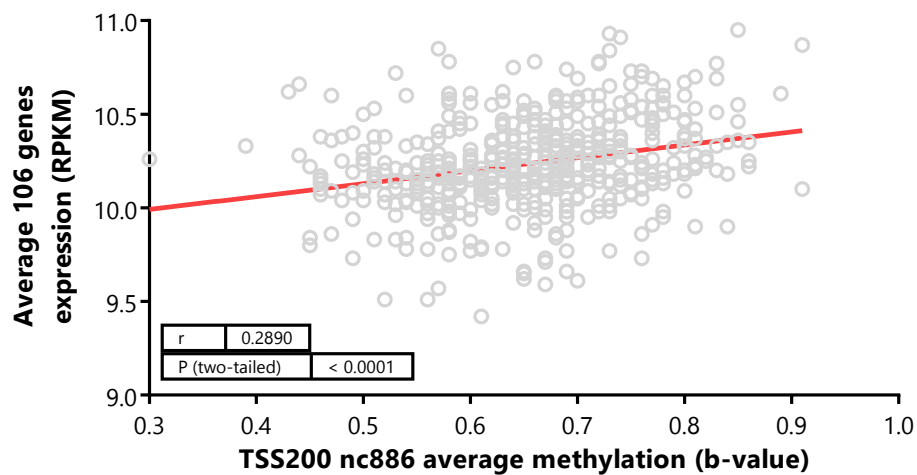





## hsa-miR-886-5p

uaccCGGGUCGGAGUAGCUCAAGCGGUUACCUCUCAUGCCGGACUUUCUAUCUGUCCAUUCUGUCUGGGGUUCGAGACC

|                                     |    |   |     |
|-------------------------------------|----|---|-----|
| .aAccgggucggaguuagcucaagcgg.....    | 2  | 1 | seq |
| .accCGGGUCGGAGUAGCUCAAGCGG.....     | 11 | 0 | seq |
| .UccCGGGUCGGAGUAGCUCAAGCGG.....     | 1  | 1 | seq |
| .acUcgggucggaguuagcucaagcgg.....    | 1  | 1 | seq |
| .accCGGGUCGGAGUAGCUCAAGCGU.....     | 4  | 1 | seq |
| .accCGGGUCGGAGUAGCUCAAGCGGU.....    | 4  | 0 | seq |
| .accCGGGUCGGAGUAGCUCAAGCGGU.....    | 1  | 0 | seq |
| .accCGGGUCGGAGUAGCUCAAGCGGUUAC..... | 2  | 0 | seq |
| ..cUcgggucggaguuagcuc.....          | 1  | 1 | seq |
| ..Accgggucggaguuagcuc.....          | 1  | 1 | seq |
| ..cGcgggucggaguuagcuca.....         | 1  | 1 | seq |
| ..ccCGGGUCGGAGUAGCUCA.....          | 1  | 0 | seq |
| ..Accgggucggaguuagcuca.....         | 1  | 1 | seq |
| ..ccCGGGACGGAGUAGCUCA.....          | 1  | 1 | seq |
| ..ccCGGGUCGGAGUAGCUCAA.....         | 5  | 0 | seq |
| ..ccCGGGUCGGAUUAGCUCAA.....         | 1  | 1 | seq |
| ..Accgggucggaguuagcucaa.....        | 4  | 1 | seq |
| ..cccCggucggaguuagcucaag.....       | 1  | 1 | seq |
| ..ccCGGGUCGGAGUUcGcucaag.....       | 1  | 1 | seq |
| ..ccCGGGcGcgaguuagcucaag.....       | 1  | 1 | seq |
| ..cAcgggucggaguuagcucaag.....       | 1  | 1 | seq |
| ..ccCGGGUCGGAGUAGCUCAAG.....        | 9  | 0 | seq |
| ..Accgggucggaguuagcucaag.....       | 3  | 1 | seq |
| ..cccgUgucggaguuagcucaag.....       | 1  | 1 | seq |
| ..Accgggucggaguuagcucaagc.....      | 14 | 1 | seq |
| ..cAcgggucggaguuagcucaagc.....      | 2  | 1 | seq |
| ..ccCGGGACGGAGUAGCUCAAGC.....       | 1  | 1 | seq |
| ..ccCGGGUCGGGGuagcucaagc.....       | 1  | 1 | seq |
| ..UccCGGGUCGGAGUAGCUCAAGC.....      | 2  | 1 | seq |
| ..ccCGGGcGcgaguuagcucaagc.....      | 2  | 1 | seq |
| ..ccCGGGUCGGAGUAGcGcaagc.....       | 1  | 1 | seq |
| ..ccCGGGUCGGAGUAGCUCAAGC.....       | 51 | 0 | seq |
| ..ccGgggucggaguuagcucaagc.....      | 1  | 1 | seq |
| ..cAcgggucggaguuagcucaagcg.....     | 3  | 1 | seq |
| ..ccCGGGUCGGcGuuagcucaagcg.....     | 1  | 1 | seq |
| ..ccCGGGUCGGAGUAGCUCAAGCG.....      | 20 | 0 | seq |
| ..cccgUgucggaguuagcucaagcg.....     | 1  | 1 | seq |
| ..Accgggucggaguuagcucaagcg.....     | 9  | 1 | seq |
| ..ccCGGGUCGGAGUAGCUCAAGCGU.....     | 1  | 1 | seq |
| ..cccgCgucggaguuagcucaagcgg.....    | 1  | 1 | seq |
| ..ccCGGGUCGGAGUAGCUCAAGCGG.....     | 28 | 0 | seq |
| ..Accgggucggaguuagcucaagcgg.....    | 8  | 1 | seq |
| ..cAcgggucggaguuagcucaagcgg.....    | 2  | 1 | seq |
| ..cccCggucggaguuagcucaagcgg.....    | 1  | 1 | seq |
| ..ccCGGGUCGGAGUagcucaagcgg.....     | 1  | 1 | seq |
| ..ccCGGGUCGGAGGuagcucaagcgg.....    | 1  | 1 | seq |
| ..ccCGGGUCGGAUUAGCUCAAGCGG.....     | 1  | 1 | seq |
| ..ccCGGGcGcgaguuagcucaagcgg.....    | 1  | 1 | seq |
| ..AccgggucggaguuagcucaagcggU.....   | 5  | 1 | seq |
| ..ccCGGGUCGGAGUAGCUCAAGCGGU.....    | 17 | 0 | seq |
| ..ccCGGGUCGGcGuuagcucaagcggU.....   | 1  | 1 | seq |
| ..cAcgggucggaguuagcucaagcggU.....   | 2  | 1 | seq |
| ..ccCGGGUCGGAGUAGCUCAAGCGGU.....    | 4  | 0 | seq |
| ..Ucgggucggaguuagcuc.....           | 1  | 1 | seq |
| ..ccUggucggaguuagcuc.....           | 1  | 1 | seq |
| ..ccgggucggaguuagcuc.....           | 5  | 0 | seq |
| ..ccCggucggaguuagcuca.....          | 1  | 1 | seq |
| ..ccgggucggaguuagcuca.....          | 14 | 0 | seq |
| ..cGgggucggaguuagcuca.....          | 1  | 1 | seq |
| ..ccUggucggaguuagcuca.....          | 1  | 1 | seq |
| ..ccgggucggaguuagcCcaa.....         | 1  | 1 | seq |
| ..ccgggucggaguuagcucaa.....         | 17 | 0 | seq |
| ..ccgggucggAUUAGCUCAA.....          | 1  | 1 | seq |
| ..ccUggucggaguuagcucaa.....         | 1  | 1 | seq |
| ..ccCggucggaguuagcucaa.....         | 1  | 1 | seq |
| ..ccCggucggaguuagcucaag.....        | 1  | 1 | seq |
| ..ccgggUAggaguuagcucaag.....        | 1  | 1 | seq |
| ..ccgggACggaguuagcucaag.....        | 1  | 1 | seq |
| ..cUgggucggaguuagcucaag.....        | 1  | 1 | seq |
| ..ccUggucggaguuagcucaag.....        | 1  | 1 | seq |

## hsa-miR-886-5p

uaccgggucggaguuagcucaagcggguuaccuccuacugccggacuuucuaucuguccaucucugucgugggguucgagaccgcggggugcuuacugacccuuuuuauugc

|                                   |     |   |     |
|-----------------------------------|-----|---|-----|
| ...cggggucUgaguuagcucaag.....     | 1   | 1 | seq |
| ...cAgggucggaguuagcucaag.....     | 1   | 1 | seq |
| ...cggggucggaguuagcucaag.....     | 45  | 0 | seq |
| ...cggggucUggaguuagcucaag.....    | 1   | 1 | seq |
| ...cAggucggaguuagcucaagc.....     | 1   | 1 | seq |
| ...cgggUucggaguuagcucaagc.....    | 4   | 1 | seq |
| ...cggggucAggaguuagcucaagc.....   | 2   | 1 | seq |
| ...cggggucggagUuagcucaagc.....    | 1   | 1 | seq |
| ...cggggucUgaguuagcucaagc.....    | 1   | 1 | seq |
| ...cggggucggaguuagUucaagc.....    | 1   | 1 | seq |
| ...Acgggucggaguuagcucaagc.....    | 3   | 1 | seq |
| ...cggUgucggaguuagcucaagc.....    | 1   | 1 | seq |
| ...cgggCucggaguuagcucaagc.....    | 1   | 1 | seq |
| ...cggggucggagUcagcucaagc.....    | 1   | 1 | seq |
| ...cggggucCgaguuagcucaagc.....    | 1   | 1 | seq |
| ...cggggucggaguuCgcucaagc.....    | 1   | 1 | seq |
| ...cAgggucggaguuagcucaagc.....    | 4   | 1 | seq |
| ...ccUggucggaguuagcucaagc.....    | 15  | 1 | seq |
| ...cggggucggaguuagcucaCgc.....    | 2   | 1 | seq |
| ...ccCggucggaguuagcucaagc.....    | 2   | 1 | seq |
| ...cggggucggaguuagcCcaagc.....    | 1   | 1 | seq |
| ...cggggucggaguuagcucaagU.....    | 5   | 1 | seq |
| ...cggggucggaguuagcucaagA.....    | 1   | 1 | seq |
| ...cUgggucggaguuagcucaagc.....    | 3   | 1 | seq |
| ...cggggucggagUgagcucaagc.....    | 1   | 1 | seq |
| ...cGgggucggaguuagcucaagc.....    | 3   | 1 | seq |
| ...cggggucggaguuagcuGaagc.....    | 1   | 1 | seq |
| ...cggggucggaguuagcucaagc.....    | 202 | 0 | seq |
| ...Ucgggucggaguuagcucaagc.....    | 3   | 1 | seq |
| ...cggggucgCaguuagcucaagc.....    | 1   | 1 | seq |
| ...cggggucggagUuagcucaagc.....    | 3   | 1 | seq |
| ...cggggucggaguuagcucaCgcg.....   | 2   | 1 | seq |
| ...cggggCcgaguuagcucaagcgg.....   | 2   | 1 | seq |
| ...Ucgggucggaguuagcucaagcgg.....  | 10  | 1 | seq |
| ...cggggucggagCuaagcucaagcgg..... | 1   | 1 | seq |
| ...cggggucggaguuagUucaagcgg.....  | 1   | 1 | seq |
| ...cggggucAggaguuagcucaagcgg..... | 1   | 1 | seq |
| ...cggggucggaguuagcGcaagcgg.....  | 1   | 1 | seq |
| ...cGgggucggaguuagcucaagcgg.....  | 2   | 1 | seq |
| ...cAgggucggaguuagcucaagcgg.....  | 5   | 1 | seq |
| ...cUgggucggaguuagcucaagcgg.....  | 2   | 1 | seq |
| ...ccCggucggaguuagcucaagcgg.....  | 2   | 1 | seq |
| ...cggggucggaguuagcCcaagcgg.....  | 1   | 1 | seq |
| ...cggggucUgaguuagcucaagcgg.....  | 1   | 1 | seq |
| ...cggggucgggACuuagcucaagcgg..... | 2   | 1 | seq |
| ...Acgggucggaguuagcucaagcgg.....  | 2   | 1 | seq |
| ...cggggucggaguuagcucaagcgg.....  | 1   | 1 | seq |
| ...cgggUucggaguuagcucaagcgg.....  | 4   | 1 | seq |
| ...cggggucUggaguuagcucaagcgg..... | 1   | 1 | seq |
| ...ccUggucggaguuagcucaagcgg.....  | 22  | 1 | seq |
| ...cggggucggaguuagcucaagcA.....   | 10  | 1 | seq |
| ...cggggucggaguuagcucaagcgg.....  | 200 | 0 | seq |
| ...cggggucgggAuuagcucaagcgg.....  | 1   | 1 | seq |
| ...cggggucgggAuuagcucaagcgg.....  | 3   | 1 | seq |
| ...cggggucggaguuagcuGaagcgg.....  | 1   | 1 | seq |
| ...ccAggucggaguuagcucaagcgg.....  | 4   | 1 | seq |
| ...cggggucggaguuagcucaCgcgg.....  | 4   | 1 | seq |
| ...cggggucggaguuagcucaagcgg.....  | 818 | 0 | seq |
| ...cggggucggaguuagcucaGgcgg.....  | 1   | 1 | seq |
| ...cggggucggaguuagcucaaCcg.....   | 1   | 1 | seq |
| ...Ucgggucggaguuagcucaagcgg.....  | 9   | 1 | seq |
| ...cggggCcgaguuagcucaagcgg.....   | 2   | 1 | seq |
| ...cggggucggaguuAUcucaagcgg.....  | 3   | 1 | seq |
| ...cAgggucggaguuagcucaagcgg.....  | 12  | 1 | seq |
| ...ccCggucggaguuagcucaagcgg.....  | 14  | 1 | seq |
| ...cgggUucggaguuagcucaagcgg.....  | 12  | 1 | seq |
| ...cggUgucggaguuagcucaagcgg.....  | 1   | 1 | seq |
| ...cggggucAggaguuagcucaagcgg..... | 3   | 1 | seq |
| ...cggggucgggAuuagcucaagcgg.....  | 4   | 1 | seq |



## hsa-miR-886-5p

uaccCGGGUCGGAGUAGCUCAAGCGGUUACCUCUCAUGCCGGACUUUCUAUCUGUCCAUUCUGUGCGUGGGGUUCGAGACC

|                                   |     |   |     |
|-----------------------------------|-----|---|-----|
| ...cggggucggCguuagcucaagcgg...    | 1   | 1 | seq |
| ...Acgggucggaguuagcucaagcgg...    | 15  | 1 | seq |
| ...cggggucggaguuagcucaagcUg...    | 1   | 1 | seq |
| ...cggAgucggaguuagcucaagcgg...    | 1   | 1 | seq |
| ...cggggucgggaUuuagcucaagcgg...   | 5   | 1 | seq |
| ...cggggucggaguuGgcucaagcgg...    | 1   | 1 | seq |
| ...cggggucggagCuaagcucaagcgg...   | 6   | 1 | seq |
| ...ccUggucggaguuagcucaagcgg...    | 93  | 1 | seq |
| ...cggggucggaguuagAucaagcgg...    | 1   | 1 | seq |
| ...cggggucgUaguuagcucaagcgg...    | 1   | 1 | seq |
| ...cggggucggaguuagUucaagcgg...    | 3   | 1 | seq |
| ...cggggucggagGuaagcucaagcgg...   | 2   | 1 | seq |
| ...cggggucggaguuagcucaagcGU...    | 24  | 1 | seq |
| ...cggggucgggaCuuaagcucaagcgg...  | 1   | 1 | seq |
| ...cggggucggaguuagcucaagcgcC...   | 2   | 1 | seq |
| ...cggggucggaguuagcucaagcAg...    | 1   | 1 | seq |
| ...cgggAucggaguuagcucaagcgg...    | 2   | 1 | seq |
| ...cUgggucggaguuagcucaagcgg...    | 2   | 1 | seq |
| ...cggggucggaguuagcucaagcgA...    | 51  | 1 | seq |
| ...cGgggucggaguuagcucaagcgg...    | 7   | 1 | seq |
| ...cggggucggaguuagcuCagcgg...     | 2   | 1 | seq |
| ...cggggUggaguuagcucaagcgg...     | 5   | 1 | seq |
| ...cgggCucggaguuagcucaagcgg...    | 1   | 1 | seq |
| ...cggggucUgaguuagcucaagcgg...    | 2   | 1 | seq |
| ...cggggUaggaguuagcucaagcggU...   | 2   | 1 | seq |
| ...ccAggucggaguuagcucaagcggU...   | 1   | 1 | seq |
| ...cggggucggagAuaagcucaagcggU...  | 1   | 1 | seq |
| ...cggggucggagGuaagcucaagcggU...  | 1   | 1 | seq |
| ...cggggucggaguuagcucaagcggU...   | 293 | 0 | seq |
| ...cggggucggaguuagcAcaagcggU...   | 1   | 1 | seq |
| ...cggggGcggaguuagcucaagcggU...   | 2   | 1 | seq |
| ...cggggucggaguuagcuAaagcggU...   | 1   | 1 | seq |
| ...cggggucgggaUuuagcucaagcggU...  | 1   | 1 | seq |
| ...cggggucggaguuagUucaagcggU...   | 1   | 1 | seq |
| ...cggggucggCguuagcucaagcggU...   | 1   | 1 | seq |
| ...cggggucggaguuagcuGaagcggU...   | 1   | 1 | seq |
| ...cggggucggaguuagcucaUgcggU...   | 1   | 1 | seq |
| ...cggggucggaguuagcucaaUcggu...   | 1   | 1 | seq |
| ...cAgggucggaguuagcucaagcggU...   | 3   | 1 | seq |
| ...cggggucggaguuagcucaagcggA...   | 10  | 1 | seq |
| ...cggggCcgaguuagcucaagcggU...    | 1   | 1 | seq |
| ...cggggucgggaCuuaagcucaagcggU... | 1   | 1 | seq |
| ...cUgggucggaguuagcucaagcggU...   | 1   | 1 | seq |
| ...cggggucggaguuagcucaGgcggU...   | 1   | 1 | seq |
| ...cggggucggaguuagcucaagcgUu...   | 1   | 1 | seq |
| ...cggggucggaguuagcucaagcgCu...   | 2   | 1 | seq |
| ...cgggUucggaguuagcucaagcggU...   | 8   | 1 | seq |
| ...AcgggucggaguuagcucaagcggU...   | 8   | 1 | seq |
| ...cggggucggUguuagcucaagcggU...   | 1   | 1 | seq |
| ...cggggucggaguuUcucaagcggU...    | 2   | 1 | seq |
| ...ccUggucggaguuagcucaagcggU...   | 25  | 1 | seq |
| ...cGgggucggaguuagcucaagcggU...   | 4   | 1 | seq |
| ...cggggucggaguuagcucaagcAGu...   | 1   | 1 | seq |
| ...cggggucggaguuagcucaagAGgu...   | 1   | 1 | seq |
| ...ccCggucggaguuagcucaagcggU...   | 6   | 1 | seq |
| ...cggggUggaguuagcucaagcggU...    | 1   | 1 | seq |
| ...cggggucggagCuagcucaagcggU...   | 1   | 1 | seq |
| ...UcgggucggaguuagcucaagcggU...   | 3   | 1 | seq |
| ...cUgggucggaguuagcucaagcggUu...  | 1   | 1 | seq |
| ...cAgggucggaguuagcucaagcggUu...  | 2   | 1 | seq |
| ...cggggucggaguuagcucaagcggUu...  | 24  | 0 | seq |
| ...AcgggucggaguuagcucaagcggUu...  | 1   | 1 | seq |
| ...cggggucgggaUuuagcucaagcggUu... | 1   | 1 | seq |
| ...ccUggucggaguuagcucaagcggUu...  | 1   | 1 | seq |
| ...cGgggucggaguuagcucaagcggUu...  | 2   | 1 | seq |
| ...cggggucggaguuagcucaagcggUA...  | 9   | 1 | seq |
| ...cggggucggaguuagcucaagAGguu...  | 2   | 1 | seq |
| ...cggggucggaguuagcucaagcggUAa... | 2   | 1 | seq |
| ...cggggucggaguuagcucaagcggUua... | 3   | 0 | seq |

## hsa-miR-886-5p

uaccgggucggaguuagcucaagcgguuuaccuccucaugccggacuuuucuaucuguccaucucugucgugggguucgagacccgcgggugcuuacugacccuuuuuauugc

|                                       |     |   |     |
|---------------------------------------|-----|---|-----|
| ...cggggucggaguuagcucaagcgguuU.....   | 8   | 1 | seq |
| ...ccggggucggaguuagcucaagcgguuuU..... | 1   | 1 | seq |
| ...cgggAcggaguuagcuca.....            | 4   | 1 | seq |
| ...cggggucggagGuaagcuca.....          | 1   | 1 | seq |
| ...cggggucggaguuagAuca.....           | 1   | 1 | seq |
| ...cggggucGgaguuagcuca.....           | 1   | 1 | seq |
| ...cggggucggUGuuagcuca.....           | 1   | 1 | seq |
| ...cggggGcggaguuagcuca.....           | 10  | 1 | seq |
| ...cAgggucggaguuagcuca.....           | 2   | 1 | seq |
| ...cgUGucggaguuagcuca.....            | 17  | 1 | seq |
| ...cggggucggCGuuagcuca.....           | 3   | 1 | seq |
| ...cggggCcgaguuagcuca.....            | 5   | 1 | seq |
| ...cgCGucggaguuagcuca.....            | 2   | 1 | seq |
| ...cggggucggaguuagcuca.....           | 123 | 0 | seq |
| ...cggggucggaUuuagcuca.....           | 4   | 1 | seq |
| ...cggggucggaCuuagcuca.....           | 3   | 1 | seq |
| ...cggggucggagCuagcuca.....           | 1   | 1 | seq |
| ...cggggucggaguuCgcuca.....           | 1   | 1 | seq |
| ...cggCucggaguuagcuca.....            | 2   | 1 | seq |
| ...UGgggucggaguuagcuca.....           | 6   | 1 | seq |
| ...cggggucggaguuagcucUa.....          | 1   | 1 | seq |
| ...cggguGggaguuagcucaa.....           | 1   | 1 | seq |
| ...cgggAcggaguuagcucaa.....           | 1   | 1 | seq |
| ...cggggucggaguuagcucaa.....          | 175 | 0 | seq |
| ...cAgggucggaguuagcucaa.....          | 1   | 1 | seq |
| ...cgAgucggaguuagcucaa.....           | 3   | 1 | seq |
| ...cggggucggaguuagcucCa.....          | 2   | 1 | seq |
| ...cggCucggaguuagcucaa.....           | 1   | 1 | seq |
| ...cggggucggaguuCgcucaa.....          | 1   | 1 | seq |
| ...cggggucggaCuuagcucaa.....          | 1   | 1 | seq |
| ...cggggucggaguuagUuca.....           | 2   | 1 | seq |
| ...Agggucggaguuagcucaa.....           | 4   | 1 | seq |
| ...cggggucggaguuagcAcaa.....          | 1   | 1 | seq |
| ...UGgggucggaguuagcucaa.....          | 7   | 1 | seq |
| ...cggggucggagGuaagcucaa.....         | 2   | 1 | seq |
| ...cggggucggaguuGgcucaa.....          | 1   | 1 | seq |
| ...cggggucCGaguuagcucaa.....          | 1   | 1 | seq |
| ...cggggucggagCuagcucaa.....          | 2   | 1 | seq |
| ...cggguUGgaguuagcucaa.....           | 1   | 1 | seq |
| ...cggggucggaAuuagcucaa.....          | 1   | 1 | seq |
| ...cUGgucggaguuagcucaa.....           | 1   | 1 | seq |
| ...cggggucggCGuuagcucaa.....          | 2   | 1 | seq |
| ...cggggucggaguuagAucaa.....          | 1   | 1 | seq |
| ...cggggucggaguuagcucaa.....          | 1   | 1 | seq |
| ...cggggGcggaguuagcucaa.....          | 9   | 1 | seq |
| ...cggggCcgaguuagcucaa.....           | 2   | 1 | seq |
| ...cggggucggagAuagcucaa.....          | 1   | 1 | seq |
| ...Ggggucggaguuagcucaa.....           | 2   | 1 | seq |
| ...cgUGucggaguuagcucaa.....           | 25  | 1 | seq |
| ...cggggucUGaguuagcucaa.....          | 1   | 1 | seq |
| ...cgCGucggaguuagcucaa.....           | 4   | 1 | seq |
| ...cggggucggUGuuagcucaa.....          | 1   | 1 | seq |
| ...cggggucggaguuagcGcaa.....          | 4   | 1 | seq |
| ...cggggucggaUuuagcucaa.....          | 8   | 1 | seq |
| ...cggggucgUaguuaagcucaa.....         | 2   | 1 | seq |
| ...cggguUGgaguuagcucaag.....          | 3   | 1 | seq |
| ...cggggucggaguuagcGcaag.....         | 2   | 1 | seq |
| ...cggggucgUaguuaagcucaag.....        | 2   | 1 | seq |
| ...cggggucggaguuagcucaag.....         | 1   | 1 | seq |
| ...cgggAcggaguuagcucaag.....          | 7   | 1 | seq |
| ...cggCucggaguuagcucaag.....          | 2   | 1 | seq |
| ...cggggucggaguuagcucaaA.....         | 8   | 1 | seq |
| ...cggggucggaguuagcAcaag.....         | 2   | 1 | seq |
| ...cggggucggaguuagcCcaag.....         | 1   | 1 | seq |
| ...cggggucggagCuagcucaag.....         | 2   | 1 | seq |
| ...cggggucggaguuagcucGag.....         | 1   | 1 | seq |
| ...cggggucggaguuagcucaCg.....         | 1   | 1 | seq |
| ...cggggucggaguuagUucaag.....         | 3   | 1 | seq |
| ...cggggucggaguuCgcucaag.....         | 4   | 1 | seq |

uacc**cg**ggguc**gg**aguuagcu**caag**cggguuaccuccucaugccggacuuucuaucuguccaucugucgugcugggguucgagacc**cg**cgggugcuuacugacccuuuuauugc

|                               |      |   |     |
|-------------------------------|------|---|-----|
| ...cgggucgCaguuagcucaag.....  | 1    | 1 | seq |
| ...cgggucggaUuuagcucaag.....  | 1    | 1 | seq |
| ...cgggucAgaguuagcucaag.....  | 2    | 1 | seq |
| ...cgggucUgaguuagcucaag.....  | 2    | 1 | seq |
| ...cgggucggaguuUcucaag.....   | 1    | 1 | seq |
| ...cgggucggagUGagcucaag.....  | 1    | 1 | seq |
| ...cgggucggaguuagAucaag.....  | 2    | 1 | seq |
| ...Ugggucggaguuagcucaag.....  | 10   | 1 | seq |
| ...Agggucggaguuagcucaag.....  | 5    | 1 | seq |
| ...cgggucggaCuuagcucaag.....  | 1    | 1 | seq |
| ...cgggucggaguuagcucaaU.....  | 4    | 1 | seq |
| ...cgggucggCGuuagcucaag.....  | 4    | 1 | seq |
| ...cgggCGggaguuagcucaag.....  | 8    | 1 | seq |
| ...cgggucggagUCagcucaag.....  | 1    | 1 | seq |
| ...cgggucggUGuuagcucaag.....  | 1    | 1 | seq |
| ...cAggucggaguuagcucaag.....  | 4    | 1 | seq |
| ...cgAgucggaguuagcucaag.....  | 7    | 1 | seq |
| ...cgggucggaAuuaagcucaag..... | 1    | 1 | seq |
| ...cgCGucggaguuagcucaag.....  | 4    | 1 | seq |
| ...cgggucggagGUagcucaag.....  | 5    | 1 | seq |
| ...cgggucggaguuagcuAaag.....  | 2    | 1 | seq |
| ...cgggGcggaguuagcucaag.....  | 21   | 1 | seq |
| ...cgggucggaguuagcucaag.....  | 259  | 0 | seq |
| ...cggguGggaguuagcucaag.....  | 1    | 1 | seq |
| ...cCGgucggaguuagcucaag.....  | 1    | 1 | seq |
| ...cgUGucggaguuagcucaag.....  | 37   | 1 | seq |
| ...cgggucCGaguuagcucaag.....  | 1    | 1 | seq |
| ...cgggucgCaguuagcucaagc..... | 1    | 1 | seq |
| ...cgUGucggaguuagcucaagc..... | 155  | 1 | seq |
| ...cgggucggaguuagcucaagc..... | 1442 | 0 | seq |
| ...Ggggucggaguuagcucaagc..... | 2    | 1 | seq |
| ...cggUucggaguuagcucaagc..... | 2    | 1 | seq |
| ...cgggucggaguuagcucCagc..... | 7    | 1 | seq |
| ...cgggCGggaguuagcucaagc..... | 39   | 1 | seq |
| ...Agggucggaguuagcucaagc..... | 14   | 1 | seq |
| ...cggCucggaguuagcucaagc..... | 5    | 1 | seq |
| ...cgggucggaguuagcuAaagc..... | 2    | 1 | seq |
| ...cgggucggaguuagcCcaagc..... | 2    | 1 | seq |
| ...cggguUggaguuagcucaagc..... | 8    | 1 | seq |
| ...cgggGcggaguuagcucaagc..... | 52   | 1 | seq |
| ...cgggucggaguuagcucaaCc..... | 2    | 1 | seq |
| ...cggAuCggaguuagcucaagc..... | 2    | 1 | seq |
| ...cgggucggaguuagAucaagc..... | 1    | 1 | seq |
| ...cgggucggaguuCGcucaagc..... | 13   | 1 | seq |
| ...cgggucggagGUagcucaagc..... | 7    | 1 | seq |
| ...cggguGggaguuagcucaagc..... | 9    | 1 | seq |
| ...cgggucggaguuUgcuaagc.....  | 1    | 1 | seq |
| ...cgggucggaguuUcucaagc.....  | 6    | 1 | seq |
| ...cggguAggaguuagcucaagc..... | 1    | 1 | seq |
| ...cgggucggagUCagcucaagc..... | 3    | 1 | seq |
| ...cgggucAgaguuagcucaagc..... | 2    | 1 | seq |
| ...cgggucggaguuagcuUaagc..... | 1    | 1 | seq |
| ...cAggucggaguuagcucaagc..... | 6    | 1 | seq |
| ...cgggucggaguuagcucaaUc..... | 1    | 1 | seq |
| ...cgggucggagUagcucaagc.....  | 3    | 1 | seq |
| ...cgggucggaguuACcucaagc..... | 1    | 1 | seq |
| ...cgggucgUaguuagcucaagc..... | 3    | 1 | seq |
| ...cgggucggaguuGgcuaagc.....  | 3    | 1 | seq |
| ...cgAgucggaguuagcucaagc..... | 11   | 1 | seq |
| ...cgggucgAguuagcucaagc.....  | 4    | 1 | seq |
| ...cgggucggUGuuagcucaagc..... | 18   | 1 | seq |
| ...cgggucggaguuagcucaagA..... | 26   | 1 | seq |
| ...cgggucggagCUagcucaagc..... | 7    | 1 | seq |
| ...Ugggucggaguuagcucaagc..... | 45   | 1 | seq |
| ...cgggucggaguuagcucaCgc..... | 3    | 1 | seq |
| ...cgggucggaCuuagcucaagc..... | 1    | 1 | seq |
| ...cUGgucggaguuagcucaagc..... | 4    | 1 | seq |
| ...cgggucggaguuagcucaagU..... | 8    | 1 | seq |
| ...cgggACggaguuagcucaagc..... | 14   | 1 | seq |

uacc**cgggucggaguuagcucaagc**gguuaccuccucaugccggacuuucuaucuguccaucucugucgugggguucgagacc**cgcgggugcuuacugacccuuu**uauugc

|                                 |      |   |     |
|---------------------------------|------|---|-----|
| ...cgggucggaguuagcGcaagc.....   | 3    | 1 | seq |
| ...cgCgucggaguuagcucaagc.....   | 16   | 1 | seq |
| ...cgggucUgaguuagcucaagc.....   | 12   | 1 | seq |
| ...cgggucggcCguuagcucaagc.....  | 13   | 1 | seq |
| ...cgggucggagugagcucaagc.....   | 8    | 1 | seq |
| ...cgggucggaguuagcucaUgc.....   | 1    | 1 | seq |
| ...cgggucgggaAuuagcucaagc.....  | 1    | 1 | seq |
| ...cgggucggaguuagcucaagcG.....  | 1    | 1 | seq |
| ...cgggucAggaguuagcucaagcG..... | 3    | 1 | seq |
| ...cgggucggagCugagcucaagcG..... | 15   | 1 | seq |
| ...cgggucgggaAuuagcucaagcG..... | 3    | 1 | seq |
| ...cgggucUggaguuagcucaagcG..... | 1    | 1 | seq |
| ...cgggucggaguuagcucaGgcG.....  | 1    | 1 | seq |
| ...cgggucGggaguuagcucaagcG..... | 2    | 1 | seq |
| ...cgggucgUaguuagcucaagcG.....  | 4    | 1 | seq |
| ...cgggucggaguuAacucaagcG.....  | 1    | 1 | seq |
| ...cgAguccggaguuagcucaagcG..... | 11   | 1 | seq |
| ...cUggucggaguuagcucaagcG.....  | 3    | 1 | seq |
| ...cgggAacggaguuagcucaagcG..... | 11   | 1 | seq |
| ...cgggucggagGugagcucaagcG..... | 4    | 1 | seq |
| ...cgggucggaguuagcucaCgcG.....  | 8    | 1 | seq |
| ...cgggGcggaguuagcucaagcG.....  | 45   | 1 | seq |
| ...cgggucggaguuUgcucaagcG.....  | 2    | 1 | seq |
| ...cgggucggaguuagcCcaagcG.....  | 1    | 1 | seq |
| ...cgggCcgaguuagcucaagcG.....   | 38   | 1 | seq |
| ...cgggucggaguuAucucaagcG.....  | 5    | 1 | seq |
| ...cgggucggaguuagcuUaagcG.....  | 3    | 1 | seq |
| ...cgggucggaguuGgcucaagcG.....  | 6    | 1 | seq |
| ...cgggucgAaguuagcucaagcG.....  | 3    | 1 | seq |
| ...cgggucggagugagcucaagcG.....  | 2    | 1 | seq |
| ...cgggucgggGguuagcucaagcG..... | 1    | 1 | seq |
| ...cgggucggaguuagcuCagcG.....   | 14   | 1 | seq |
| ...cgggucggaguuagcucaagAg.....  | 4    | 1 | seq |
| ...cgggucggaguuagcucaagcA.....  | 63   | 1 | seq |
| ...cgggucggaguuagcucaaAacG..... | 2    | 1 | seq |
| ...AgggucggaguuagcucaagcG.....  | 10   | 1 | seq |
| ...cgggucggaguuagcucaagcG.....  | 1469 | 0 | seq |
| ...cgggucggaguuagcGcaagcG.....  | 4    | 1 | seq |
| ...GgggucggaguuagcucaagcG.....  | 3    | 1 | seq |
| ...cgggucggcCguuagcucaagcG..... | 12   | 1 | seq |
| ...cgggucggaguuagcucaagcG.....  | 5    | 1 | seq |
| ...cgggucggaguuagcucaagUg.....  | 2    | 1 | seq |
| ...cgggucgggUguuagcucaagcG..... | 26   | 1 | seq |
| ...cggaucggaguuagcucaagcG.....  | 1    | 1 | seq |
| ...UgggucggaguuagcucaagcG.....  | 42   | 1 | seq |
| ...cggUucggaguuagcucaagcG.....  | 4    | 1 | seq |
| ...cgggucggaUuuagcucaagcG.....  | 3    | 1 | seq |
| ...cgggucggaguuagAucaagcG.....  | 2    | 1 | seq |
| ...cgggucUgaguuagcucaagcG.....  | 18   | 1 | seq |
| ...cgCgucggaguuagcucaagcG.....  | 28   | 1 | seq |
| ...cgggucggaguuagcucaagcU.....  | 4    | 1 | seq |
| ...cgggucggaguuagcuAaagcG.....  | 3    | 1 | seq |
| ...cgggucggaguuagcAcaagcG.....  | 4    | 1 | seq |
| ...cgggucggagAuaagcucaagcG..... | 4    | 1 | seq |
| ...cgggucggaguuagcucaUgcG.....  | 4    | 1 | seq |
| ...cgggucggaguuCgcucaagcG.....  | 17   | 1 | seq |
| ...cCggucggaguuagcucaagcG.....  | 2    | 1 | seq |
| ...cggCucggaguuagcucaagcG.....  | 7    | 1 | seq |
| ...cgUgucggaguuagcucaagcG.....  | 116  | 1 | seq |
| ...cgggucCgaguuagcucaagcG.....  | 2    | 1 | seq |
| ...cgggucggaguuagcucaagcC.....  | 1    | 1 | seq |
| ...cgggucggaguCagcucaagcG.....  | 6    | 1 | seq |
| ...cgggucggaguuagcucaaUcg.....  | 4    | 1 | seq |
| ...cAguucggaguuagcucaagcG.....  | 5    | 1 | seq |
| ...cgggucggaCuagcucaagcG.....   | 5    | 1 | seq |
| ...cgggucAgaguuagcucaagcG.....  | 6    | 1 | seq |
| ...cgggucggaguuagAucaagcgg..... | 1    | 1 | seq |
| ...cgggucggaguuagcuUaagcgg..... | 14   | 1 | seq |
| ...cgggucggaguuagcucaGgcgg..... | 1    | 1 | seq |

uacccggguccggaguuagcucaagccgguuaccuccucaugccggacuuuucuaucuguccaucucugucgugggguucgagacccgcggggugcuuacugacccuuuuuauugc

|                                    |       |   |     |
|------------------------------------|-------|---|-----|
| ...Agggucgggaguuagcucaagcgg.....   | 74    | 1 | seq |
| ...cgggGcgggaguuagcucaagcgg.....   | 194   | 1 | seq |
| ...cgUgucgggaguuagcucaagcgg.....   | 1384  | 1 | seq |
| ...cgggucgggaguuagcCcaagcgg.....   | 27    | 1 | seq |
| ...cgggucgggaguuagcGcaagcgg.....   | 53    | 1 | seq |
| ...cgggucgggaguuagcucaaCcg.....    | 9     | 1 | seq |
| ...cgggucgggaguuagcucaagcgA.....   | 714   | 1 | seq |
| ...cgggucgggaguuagUucaagcgg.....   | 5     | 1 | seq |
| ...cgggucgggaguuagcucaagcgg.....   | 55    | 1 | seq |
| ...cgggucgggaguuagcucaaUcg.....    | 13    | 1 | seq |
| ...cgGcucgggaguuagcucaagcgg.....   | 38    | 1 | seq |
| ...cgggucgggaguuagcucaagcgg.....   | 16377 | 0 | seq |
| ...cgggucgggaguuagcucaagAgg.....   | 18    | 1 | seq |
| ...cgAgucgggaguuagcucaagcgg.....   | 84    | 1 | seq |
| ...cAggucgggaguuagcucaagcgg.....   | 58    | 1 | seq |
| ...cgggucgggUguuagcucaagcgg.....   | 44    | 1 | seq |
| ...cCggucgggaguuagcucaagcgg.....   | 17    | 1 | seq |
| ...cgggucGcaguuagcucaagcgg.....    | 6     | 1 | seq |
| ...cgggucgggaUuuagcucaagcgg.....   | 26    | 1 | seq |
| ...cgggucggUaguuagcucaagcgg.....   | 21    | 1 | seq |
| ...cgggucgggaguuUcucaagcgg.....    | 12    | 1 | seq |
| ...cgggucgggaguuagcuAaagcgg.....   | 3     | 1 | seq |
| ...cgggucgggaguuagGucaagcgg.....   | 3     | 1 | seq |
| ...cgggucgggaguuagcucaagcgU.....   | 198   | 1 | seq |
| ...cgggucgggagAuaagcucaagcgg.....  | 4     | 1 | seq |
| ...cggAuucgggaguuagcucaagcgg.....  | 21    | 1 | seq |
| ...cgggucgggaguuAaCucaagcgg.....   | 4     | 1 | seq |
| ...cgggucgggaguuagcucaCcg.....     | 34    | 1 | seq |
| ...cgggucgggaAuuagcucaagcgg.....   | 12    | 1 | seq |
| ...Ugggucgggaguuagcucaagcgg.....   | 287   | 1 | seq |
| ...cgggucggGguuagcucaagcgg.....    | 4     | 1 | seq |
| ...cgggucgggagGuagcucaagcgg.....   | 53    | 1 | seq |
| ...cgggucgggaCuuaagcucaagcgg.....  | 6     | 1 | seq |
| ...cgggucgggaguuagcuCagcgg.....    | 12    | 1 | seq |
| ...cgggAucgggaguuagcucaagcgg.....  | 76    | 1 | seq |
| ...cgggucgggaguuagcucaagcgg.....   | 11    | 1 | seq |
| ...cgggucgggaguuagcuUagcgg.....    | 4     | 1 | seq |
| ...cgggucgggaguuagcucaagcgC.....   | 33    | 1 | seq |
| ...cgggucgggaguuagcucaagcCg.....   | 9     | 1 | seq |
| ...cgCgucgggaguuagcucaagcgg.....   | 166   | 1 | seq |
| ...cgggucgggaguuagcucaagcgg.....   | 32    | 1 | seq |
| ...cgggucgAaguuagcucaagcgg.....    | 13    | 1 | seq |
| ...cgggGcgggaguuagcucaagcgg.....   | 509   | 1 | seq |
| ...cgggucgggaguuCgcucaagcgg.....   | 60    | 1 | seq |
| ...cgggucgggaguuagcucaagcUg.....   | 7     | 1 | seq |
| ...cgggucgggaguuagcucaUcg.....     | 16    | 1 | seq |
| ...Ggggucgggaguuagcucaagcgg.....   | 9     | 1 | seq |
| ...cgggucAaguuagcucaagcgg.....     | 6     | 1 | seq |
| ...cgggucgggaguuGgcucaagcgg.....   | 14    | 1 | seq |
| ...cgggucgggagCuagcucaagcgg.....   | 42    | 1 | seq |
| ...cgggucGgaguuagcucaagcgg.....    | 8     | 1 | seq |
| ...cgggucUggaguuagcucaagcgg.....   | 28    | 1 | seq |
| ...cgggucgggaguuCagcucaagcgg.....  | 39    | 1 | seq |
| ...cgggucgggaguuagcAcaagcgg.....   | 14    | 1 | seq |
| ...cgggucUgaguuagcucaagcgg.....    | 32    | 1 | seq |
| ...cgggucgggaguuagcucaagUgg.....   | 5     | 1 | seq |
| ...cgggucgggaguuagcucaagGgg.....   | 8     | 1 | seq |
| ...cgggucgggaguuCcucuagcgg.....    | 2     | 1 | seq |
| ...cggUucgggaguuagcucaagcgg.....   | 10    | 1 | seq |
| ...cUggucgggaguuagcucaagcgg.....   | 11    | 1 | seq |
| ...cgggucggGguuagcucaagcgg.....    | 52    | 1 | seq |
| ...cgggucgggaguuagcuCagcgg.....    | 30    | 1 | seq |
| ...cgggucgggaguuagcucaagcAg.....   | 11    | 1 | seq |
| ...cgggucAggaguuagcucaagcgg.....   | 2     | 1 | seq |
| ...cgggucgggaguuagcucaaAacgg.....  | 2     | 1 | seq |
| ...cgggucgggaguuagcucaaUcggu.....  | 31    | 1 | seq |
| ...cgggucgggaguuagAuaagcgggu.....  | 12    | 1 | seq |
| ...cgggucAggaguuagcucaagcgggu..... | 6     | 1 | seq |

uacccgggucggaguuagcucaagcggguuaccuccucaugccggacuuuucuaucuguccaucucugucgugggguucgagacccgcgggugcuuacugacccuuuuaugc

|                                             |       |   |     |
|---------------------------------------------|-------|---|-----|
| ...cgggucggaguuagcucCagcgggu.....           | 34    | 1 | seq |
| ...cgggucgggaCu <u>uagcucaagcgggu</u> ..... | 17    | 1 | seq |
| ...cgggucggaguuCgc <u>ucaagcgggu</u> .....  | 85    | 1 | seq |
| ...cgggucggaguuAagcucaagcgggu.....          | 54    | 1 | seq |
| ...cgggucggCG <u>uuagcucaagcgggu</u> .....  | 91    | 1 | seq |
| ...cgggucggaguuA <u>Ccucaagcgggu</u> .....  | 1     | 1 | seq |
| ...cgggucggaguuagcucaagA <u>gggu</u> .....  | 23    | 1 | seq |
| ...Ugggucggaguuagcucaagcgggu.....           | 391   | 1 | seq |
| ...cgggucggaguuCagcucaagcgggu.....          | 60    | 1 | seq |
| ...Ggggucggaguuagcucaagcgggu.....           | 27    | 1 | seq |
| ...cgggucggaguuUgc <u>ucaagcgggu</u> .....  | 3     | 1 | seq |
| ...cgggucAagaguuagcucaagcgggu.....          | 17    | 1 | seq |
| ...cggA <u>ucggaguuagcucaagcgggu</u> .....  | 20    | 1 | seq |
| ...cgggucggaguuagcucaagc <u>gCu</u> .....   | 108   | 1 | seq |
| ...cgggucgUaguuagcucaagcgggu.....           | 37    | 1 | seq |
| ...cCggucggaguuagcucaagcgggu.....           | 25    | 1 | seq |
| ...cgggucCgaguuagcucaagcgggu.....           | 7     | 1 | seq |
| ...cgA <u>gucggaguuagcucaagcgggu</u> .....  | 123   | 1 | seq |
| ...cgggucggaguuagcucaagcC <u>gu</u> .....   | 12    | 1 | seq |
| ...cgggucggaguuagGucaagcgggu.....           | 9     | 1 | seq |
| ...cgggucGggaguuagcucaagcgggu.....          | 25    | 1 | seq |
| ...cggU <u>ucggaguuagcucaagcgggu</u> .....  | 19    | 1 | seq |
| ...cgggCcgaguuagcucaagcgggu.....            | 630   | 1 | seq |
| ...cUggucggaguuagcucaagcgggu.....           | 20    | 1 | seq |
| ...cgggucggaguuagcucaaA <u>cgggu</u> .....  | 10    | 1 | seq |
| ...cgggucggaguuagcucGagcgggu.....           | 25    | 1 | seq |
| ...cgggucggaguuagcucaagcggC.....            | 32    | 1 | seq |
| ...cgggA <u>cggaguuagcucaagcgggu</u> .....  | 120   | 1 | seq |
| ...cgggucggagGuagcucaagcgggu.....           | 92    | 1 | seq |
| ...cgggucggaguuagcucaagcggA.....            | 861   | 1 | seq |
| ...cgggucggaguuagcucaGgcgggu.....           | 8     | 1 | seq |
| ...cgggucUgaguuagcucaagcgggu.....           | 64    | 1 | seq |
| ...cgCgucggaguuagcucaagcgggu.....           | 197   | 1 | seq |
| ...cgggucggaguuagcucaagc <u>gAu</u> .....   | 15    | 1 | seq |
| ...cgggucggUg <u>uuagcucaagcgggu</u> .....  | 65    | 1 | seq |
| ...cgggucgAaguuagcucaagcgggu.....           | 15    | 1 | seq |
| ...cgggucggaguuagcucaagG <u>gggu</u> .....  | 19    | 1 | seq |
| ...cgggucggagA <u>uagcucaagcgggu</u> .....  | 12    | 1 | seq |
| ...cgggucggaguuagcucaaC <u>gggu</u> .....   | 3     | 1 | seq |
| ...cgggCcgaguuagcucaagcgggu.....            | 313   | 1 | seq |
| ...cgggucggaguuagcucaagU <u>gggu</u> .....  | 13    | 1 | seq |
| ...cgggucggaguuagcucaagcgggu.....           | 69    | 1 | seq |
| ...cgggucggaguuagcAcaagcgggu.....           | 10    | 1 | seq |
| ...cgggucUggaguuagcucaagcgggu.....          | 49    | 1 | seq |
| ...cgggucggaguuagcucaagc <u>gUu</u> .....   | 21    | 1 | seq |
| ...cgggucggaguuagcucaagcA <u>gu</u> .....   | 4     | 1 | seq |
| ...cgggucggagCuagcucaagcgggu.....           | 70    | 1 | seq |
| ...cggCu <u>cggaguuagcucaagcgggu</u> .....  | 67    | 1 | seq |
| ...cgggucggaguuGgcucaagcgggu.....           | 13    | 1 | seq |
| ...cgUgucggaguuagcucaagcgggu.....           | 1954  | 1 | seq |
| ...cgggucggaguuagcuUaagcgggu.....           | 31    | 1 | seq |
| ...cgggucggGg <u>uuagcucaagcgggu</u> .....  | 11    | 1 | seq |
| ...cgggucggaguuagcuGaagcgggu.....           | 2     | 1 | seq |
| ...cgggucgCaguuagcucaagcgggu.....           | 6     | 1 | seq |
| ...cgggucggaguuagcucaCgcgggu.....           | 86    | 1 | seq |
| ...cgggucggga <u>uuagcucaagcgggu</u> .....  | 29    | 1 | seq |
| ...cgggucggaguuA <u>Ucucaagcgggu</u> .....  | 23    | 1 | seq |
| ...cgggucggaguuagcucUagcgggu.....           | 6     | 1 | seq |
| ...cgggucggaguuagcCcaagcgggu.....           | 23    | 1 | seq |
| ...cgggucggaguuagcucaagcgggu.....           | 24432 | 0 | seq |
| ...cgggucggaguuagcuAaagcgggu.....           | 6     | 1 | seq |
| ...cgggucgggA <u>Uuagcucaagcgggu</u> .....  | 30    | 1 | seq |
| ...cgggucggaguuagcucaagcU <u>gu</u> .....   | 15    | 1 | seq |
| ...cgggucggaguuagcGcaagcgggu.....           | 64    | 1 | seq |
| ...cgggucggaguuA <u>Acucaagcgggu</u> .....  | 5     | 1 | seq |
| ...A <u>gggucggaguuagcucaagcgggu</u> .....  | 107   | 1 | seq |
| ...cgggucggaguuagU <u>ucaagcgggu</u> .....  | 5     | 1 | seq |
| ...cgggucggaguuagcucaUgcgggu.....           | 27    | 1 | seq |
| ...cgggucggaguuagcucaagcggG.....            | 12    | 1 | seq |

## hsa-miR-886-5p

uacccgggucggaguuagcucaagcgguuaccuccuaugccggacuuucuaucuguccaucugucgugggguucgagacccgcgggugcuuacugaccuuuuaugc

|                                     |      |   |     |
|-------------------------------------|------|---|-----|
| ...cAggucggaguuagcucaagcgggu.....   | 63   | 1 | seq |
| ...cgggucggaguuagUucaagcgggu.....   | 1    | 1 | seq |
| ...cgggucgggaCuuagcucaagcgggu.....  | 1    | 1 | seq |
| ...cgggucCgaguuagcucaagcgggu.....   | 2    | 1 | seq |
| ...cgggucggaguuagcucaagcCguu.....   | 3    | 1 | seq |
| ...cgggucggaguuagcucCagcgggu.....   | 2    | 1 | seq |
| ...cgggucggagAuuagcucaagcgggu.....  | 1    | 1 | seq |
| ...cgggucggaguuagcucaagcggGu.....   | 3    | 1 | seq |
| ...cgggucggaguuagcucaagcgCuu.....   | 2    | 1 | seq |
| ...cgggucggaguuagcucaagcUguu.....   | 4    | 1 | seq |
| ...cgggucggaguuagGucaagcgggu.....   | 1    | 1 | seq |
| ...Agggucggaguuagcucaagcgggu.....   | 8    | 1 | seq |
| ...cgggucggaguuagcucaagcggguG.....  | 105  | 1 | seq |
| ...cgggucAaguuagcucaagcgggu.....    | 1    | 1 | seq |
| ...cggAucggaguuagcucaagcgggu.....   | 3    | 1 | seq |
| ...cgCgucggaguuagcucaagcgggu.....   | 28   | 1 | seq |
| ...Ugggucggaguuagcucaagcgggu.....   | 43   | 1 | seq |
| ...cAggucggaguuagcucaagcgggu.....   | 5    | 1 | seq |
| ...cgggucggaguuagcucaagcggCu.....   | 5    | 1 | seq |
| ...cgAucggaguuagcucaagcgggu.....    | 4    | 1 | seq |
| ...cgggucggaguuCgcucaagcgggu.....   | 6    | 1 | seq |
| ...cggCucggaguuagcucaagcgggu.....   | 4    | 1 | seq |
| ...cgggucggaguuagcucaUgcgggu.....   | 5    | 1 | seq |
| ...cgggucggaguCagcucaagcgggu.....   | 7    | 1 | seq |
| ...cgggAcggaguuagcucaagcgggu.....   | 14   | 1 | seq |
| ...cgggucggagGuagcucaagcgggu.....   | 11   | 1 | seq |
| ...cgggucggaguuagcCcaagcgggu.....   | 2    | 1 | seq |
| ...cgggucggaguuagcucaagcgggu.....   | 2608 | 0 | seq |
| ...cgUgucggaguuagcucaagcgggu.....   | 213  | 1 | seq |
| ...cgggucgUaguuagcucaagcgggu.....   | 3    | 1 | seq |
| ...cgggucggaguuagcucaagcgAuu.....   | 3    | 1 | seq |
| ...cgggucggaguuAagcucaagcgggu.....  | 7    | 1 | seq |
| ...cgggucggaguuGgcucaagcgggu.....   | 1    | 1 | seq |
| ...cgggucggUguuagcucaagcgggu.....   | 3    | 1 | seq |
| ...cgggucggaguuagcucGagcgggu.....   | 4    | 1 | seq |
| ...cgggucgAaguuagcucaagcgggu.....   | 1    | 1 | seq |
| ...cgggucggaguuagcucaaUcggu.....    | 7    | 1 | seq |
| ...cgggucggaguuagcucaaCcggu.....    | 1    | 1 | seq |
| ...cggUucggaguuagcucaagcgggu.....   | 3    | 1 | seq |
| ...cgggucggGguuagcucaagcgggu.....   | 1    | 1 | seq |
| ...cCgucggaguuagcucaagcgggu.....    | 3    | 1 | seq |
| ...cgggucggaguuagcucaagGgggu.....   | 2    | 1 | seq |
| ...cgggucggaguuagcucaagcggA.....    | 69   | 1 | seq |
| ...cgggucggaguuagcucaagcgUuu.....   | 1    | 1 | seq |
| ...cgggucggaguuagcAcaagcgggu.....   | 2    | 1 | seq |
| ...cgggucggaguuUcucaagcgggu.....    | 1    | 1 | seq |
| ...cgggucggaguuagcucaCgcgggu.....   | 10   | 1 | seq |
| ...cgggucggagUGagcucaagcgggu.....   | 9    | 1 | seq |
| ...Ggggucggaguuagcucaagcgggu.....   | 7    | 1 | seq |
| ...cgggucggaguuagcGcaagcgggu.....   | 6    | 1 | seq |
| ...cgggCcgaguuagcucaagcgggu.....    | 35   | 1 | seq |
| ...cgggucggaguuagcuUaagcgggu.....   | 1    | 1 | seq |
| ...cgggucgggAuuagcucaagcgggu.....   | 2    | 1 | seq |
| ...cgggGcgaguuagcucaagcgggu.....    | 70   | 1 | seq |
| ...cgggucgggAUuuagcucaagcgggu.....  | 2    | 1 | seq |
| ...cgggucggaguuagcucaagcggguC.....  | 8    | 1 | seq |
| ...cgggucUggaguuagcucaagcgggu.....  | 5    | 1 | seq |
| ...cgggucggaguuagcucaaAcgggu.....   | 1    | 1 | seq |
| ...cgggucggagCUagcucaagcgggu.....   | 3    | 1 | seq |
| ...cgggucggCGuuagcucaagcgggu.....   | 6    | 1 | seq |
| ...cgggucggaguuagcucaagcggguA.....  | 932  | 1 | seq |
| ...cgUgucggaguuagcucaagcggguua..... | 8    | 1 | seq |
| ...cgggCcgaguuagcucaagcggguua.....  | 1    | 1 | seq |
| ...cgggGcgaguuagcucaagcggguua.....  | 3    | 1 | seq |
| ...cgggucggaguuagcucaCgcggguua..... | 1    | 1 | seq |
| ...cgggucggaguuagcucaaUcgguua.....  | 1    | 1 | seq |
| ...cgggucggaguuagcucaagcggguGa..... | 9    | 1 | seq |
| ...cgggucggagCUagcucaagcggguua..... | 1    | 1 | seq |
| ...Ugggucggaguuagcucaagcggguua..... | 1    | 1 | seq |

## hsa-miR-886-5p

uacc**cgggucggaguuagcucaagcgguu**uaccuccu**augccggacuuu**cuau**cuguccaucu**cugc**ugggguucgagaccgcgggugcuu**acug**accuuu**augc

|                                             |     |   |     |
|---------------------------------------------|-----|---|-----|
| ...cgggucggaguuagcucaagcgguuG.....          | 3   | 1 | seq |
| ...cgggucggaguuagcucaagcgguuU.....          | 532 | 1 | seq |
| ...cgggucggaguuagcucaagcgguuA.....          | 69  | 0 | seq |
| ...cgggucggaguuagcucaaA <b>cgguu</b> A..... | 1   | 1 | seq |
| ...cggUucggaguuagcucaagcgguuA.....          | 1   | 1 | seq |
| ...cgggucggaguuagcucaagcgguuAa.....         | 299 | 1 | seq |
| ...cgggucggaguuagcucaagcgguuAac.....        | 1   | 1 | seq |
| ...cgggucggaguuagcucaagcgguuAG.....         | 1   | 1 | seq |
| ...cgggucggaguuagcucaagcgguuUc.....         | 1   | 1 | seq |
| ...cgggucggaguuagcucaagcgguuAa.....         | 13  | 1 | seq |
| ...cgggucggaguuagcucaagcgguuAU.....         | 28  | 1 | seq |
| ...cgggucggaguuagcucaagcgguuac.....         | 2   | 0 | seq |
| ...cgggucggaguuagcucaagcgguuAUc.....        | 1   | 1 | seq |
| ...cgggucggaguuagcucaagcgguuacc.....        | 6   | 0 | seq |
| ...cgUgucggaguuagcucaagcgguuacc.....        | 2   | 1 | seq |
| ...cgggucUgaguuagcucaagcgguuacc.....        | 1   | 1 | seq |
| ...Uggucggaguuagcucaagcgguuacc.....         | 1   | 1 | seq |
| ...cgggucggaguuagcucaagcgguuacA.....        | 2   | 1 | seq |
| ...cgggucggaguuagcucaagcgguuAUc.....        | 1   | 1 | seq |
| ...cgggucggaguuagcucaagcgguuaccu.....       | 1   | 0 | seq |
| ...cgUgucggaguuagcucaagcgguuaccu.....       | 1   | 1 | seq |
| ...cgggucggaguuagcucaagcgguuAacu.....       | 1   | 1 | seq |
| ...cgggucggaguuagcucaagcgguuaccuc.....      | 1   | 0 | seq |
| ...cgggucggaguuagcucaagcgguuAacuc.....      | 21  | 1 | seq |
| ...cgUgucggaguuagcucaagcgguuaccuc.....      | 1   | 1 | seq |
| ...gggucggaguuagcucaa.....                  | 4   | 0 | seq |
| ...ggAucggaguuagcucaa.....                  | 1   | 1 | seq |
| ...ggUucggaguuagcucaag.....                 | 2   | 1 | seq |
| ...gggucggaguuagcucaag.....                 | 3   | 0 | seq |
| ...Cggucggaguuagcucaag.....                 | 1   | 1 | seq |
| ...gggucggaguuagcucaagc.....                | 12  | 0 | seq |
| ...ggCucggaguuagcucaagc.....                | 1   | 1 | seq |
| ...ggAucggaguuagcucaagc.....                | 1   | 1 | seq |
| ...gggucggaguuCgcucaagc.....                | 1   | 1 | seq |
| ...gggucggaguuagcucaCgc.....                | 1   | 1 | seq |
| ...gggucggaguuAagcucaagc.....               | 1   | 1 | seq |
| ...Uggucggaguuagcucaagc.....                | 3   | 1 | seq |
| ...ggUucggaguuagcucaagcg.....               | 2   | 1 | seq |
| ...Cggucggaguuagcucaagcg.....               | 2   | 1 | seq |
| ...ggCucggaguuagcucaagcg.....               | 1   | 1 | seq |
| ...gggucggaguuagcucaagcg.....               | 12  | 0 | seq |
| ...Aggucggaguuagcucaagcg.....               | 1   | 1 | seq |
| ...gggucggaguuagcucaCgcg.....               | 1   | 1 | seq |
| ...gggucggaguuagcucaGcg.....                | 1   | 1 | seq |
| ...Uggucggaguuagcucaagcg.....               | 1   | 1 | seq |
| ...gggucggaguuCgcucaagcg.....               | 1   | 1 | seq |
| ...gggucggaguuagcucaagUg.....               | 1   | 1 | seq |
| ...gggucgggACuuagcucaagcg.....              | 1   | 1 | seq |
| ...ggCucggaguuagcucaagcgg.....              | 2   | 1 | seq |
| ...gggucggCguagcucaagcgg.....               | 2   | 1 | seq |
| ...Cggucggaguuagcucaagcgg.....              | 1   | 1 | seq |
| ...gggucggaguuagcucaagcgA.....              | 1   | 1 | seq |
| ...gggucggaguuagcGcaagcgg.....              | 1   | 1 | seq |
| ...ggguUggaguuagcucaagcgg.....              | 1   | 1 | seq |
| ...gggucggaguuagcucaagcgg.....              | 101 | 0 | seq |
| ...gggucAaguuagcucaagcgg.....               | 1   | 1 | seq |
| ...ggUucggaguuagcucaagcgg.....              | 18  | 1 | seq |
| ...gggCcgaguuagcucaagcgg.....               | 1   | 1 | seq |
| ...gggucggUguuagcucaagcgg.....              | 3   | 1 | seq |
| ...Uggucggaguuagcucaagcgg.....              | 8   | 1 | seq |
| ...gggucggaguuCagcucaagcgg.....             | 1   | 1 | seq |
| ...gCgucggaguuagcucaagcgg.....              | 1   | 1 | seq |
| ...gggucggaguuagcucaagcUg.....              | 1   | 1 | seq |
| ...gggucgggAuuagcucaagcgg.....              | 1   | 1 | seq |
| ...Uggucggaguuagcucaagcgg.....              | 15  | 1 | seq |
| ...ggguUggaguuagcucaagcgg.....              | 3   | 1 | seq |
| ...gggucggaguuagcucaGgcgg.....              | 1   | 1 | seq |
| ...gggucgUaguuagcucaagcgg.....              | 1   | 1 | seq |
| ...ggAucggaguuagcucaagcgg.....              | 5   | 1 | seq |



uacccgggucggaguuagcucaagcggguuaccuccuaugccggacuuuucaucuguccaucucugcugggguucgagacccgcgggugcuuacugacccuuuuaugc

|                                             |     |   |     |
|---------------------------------------------|-----|---|-----|
| ....gggucggaguuagcucaagcgggu.....           | 503 | 0 | seq |
| ....Cggucggaguuagcucaagcgggu.....           | 8   | 1 | seq |
| ....gggucggaguuagcucaaaUcgggu.....          | 3   | 1 | seq |
| ....gggucggaguuagcucaCgcgggu.....           | 5   | 1 | seq |
| ....gggucggagGuagcucaagcgggu.....           | 1   | 1 | seq |
| ....gAgucggaguuagcucaagcgggu.....           | 1   | 1 | seq |
| ....gggucggaguuagcucaagcgUu.....            | 1   | 1 | seq |
| ....Aggucggaguuagcucaagcgggu.....           | 4   | 1 | seq |
| ....gggucggaguuagcucaagcgCu.....            | 1   | 1 | seq |
| ....gggucggaguuCgcucaagcgggu.....           | 3   | 1 | seq |
| ....gggucggaguuagcuUaagcgggu.....           | 1   | 1 | seq |
| ....gggucggUguuagcucaagcgggu.....           | 2   | 1 | seq |
| ....gggucgggaCuuaagcucaagcgggu.....         | 1   | 1 | seq |
| ....gggucggaguuGgcucaagcgggu.....           | 1   | 1 | seq |
| ....gggucggaguuagcucaagcggC.....            | 1   | 1 | seq |
| ....ggCucggaguuagcucaagcgggu.....           | 17  | 1 | seq |
| ....gggucggaguCagcucaagcgggu.....           | 1   | 1 | seq |
| ....gggucggaguuagcucaagcggA.....            | 3   | 1 | seq |
| ....ggUucggaguuagcucaagcgggu.....           | 61  | 1 | seq |
| ....gggucgAaguuagcucaagcgggu.....           | 1   | 1 | seq |
| ....gggucggaguuagcucaagcCgu.....            | 3   | 1 | seq |
| ....gggucggGguuagcucaagcgggu.....           | 1   | 1 | seq |
| ....gggucggCguuagcucaagcgggu.....           | 4   | 1 | seq |
| ....gggucggaguuagcucaagcUgu.....            | 3   | 1 | seq |
| ....gggucggaguuUgcucaagcgggu.....           | 1   | 1 | seq |
| ....ggUucggaguuagcucaagcggguu.....          | 24  | 1 | seq |
| ....gggucggaguuagcucaCgcggguu.....          | 1   | 1 | seq |
| ....gAgucggaguuagcucaagcggguu.....          | 1   | 1 | seq |
| ....Aggucggaguuagcucaagcggguu.....          | 3   | 1 | seq |
| ....gCgucggaguuagcucaagcggguu.....          | 3   | 1 | seq |
| ....Cggucggaguuagcucaagcggguu.....          | 1   | 1 | seq |
| ....gggucggaguuagcucaagcggguA.....          | 2   | 1 | seq |
| ....gggucggaguuagcuUagcggguu.....           | 1   | 1 | seq |
| ....gggucggaguuagcucaagcggguu.....          | 167 | 0 | seq |
| ....ggAucggaguuagcucaagcggguu.....          | 1   | 1 | seq |
| ....gggucggaguuagcucaagcgUuu.....           | 1   | 1 | seq |
| ....ggCucggaguuagcucaagcggguu.....          | 6   | 1 | seq |
| ....gggucggaguuagcucaagcggguA.....          | 38  | 1 | seq |
| ....gggCcgaguuagcucaagcggguu.....           | 1   | 1 | seq |
| ....gggucggaguuagcucaaUcggguu.....          | 2   | 1 | seq |
| ....ggguUggaguuagcucaagcggguu.....          | 1   | 1 | seq |
| ....gggucggaguCagcucaagcggguu.....          | 1   | 1 | seq |
| ....Uggucggaguuagcucaagcggguu.....          | 10  | 1 | seq |
| ....gggucggaguuagcucaagcggguU.....          | 1   | 1 | seq |
| ....gggucggaguuagcucaagcggguAa.....         | 3   | 1 | seq |
| ....gggucggaguCagcucaagcggguua.....         | 1   | 1 | seq |
| ....gggucggaguuagcucaagcggguU.....          | 55  | 1 | seq |
| ....gggucggaguuagcucaagcggguua.....         | 6   | 0 | seq |
| ....Cggucggaguuagcucaagcggguua.....         | 1   | 1 | seq |
| ....gggucggaguuagcucaagcggguuac.....        | 3   | 0 | seq |
| ....gggucggaguuagcucaagcggguuacc.....       | 8   | 0 | seq |
| ....gggucggaguuUgcucaagcggguuacc.....       | 1   | 1 | seq |
| ....ggUucggaguuagcucaagcggguuacc.....       | 1   | 1 | seq |
| ....gggucggaguuagcucaagcggguuaccu.....      | 1   | 0 | seq |
| ....ggucggaguuagcucaagcggg.....             | 1   | 0 | seq |
| ....ggGcggaguuagcucaagcgggu.....            | 1   | 1 | seq |
| ....ggucggaguuagcucaagcgggu.....            | 6   | 0 | seq |
| ....Ugucggaguuagcucaagcggguu.....           | 1   | 1 | seq |
| ....gucggaguuagcucaagcgggu.....             | 1   | 0 | seq |
| .....agcggguuaccuccu <u>augccggga</u> ..... | 2   | 0 | seq |
| .....guuaccuccu <u>augccggacu</u> .....     | 1   | 0 | seq |
| .....uaccuccu <u>augccggacu</u> .....       | 1   | 0 | seq |
| .....uaccuccu <u>augccggacuu</u> .....      | 5   | 0 | seq |
| .....uaccuccu <u>augccgUacuu</u> .....      | 1   | 1 | seq |
| .....uaccuccu <u>augccggacuuA</u> .....     | 1   | 1 | seq |
| .....uaUcuccu <u>augccggacuuu</u> .....     | 1   | 1 | seq |
| .....uaccuccu <u>augccggacuuu</u> .....     | 7   | 0 | seq |
| .....uaGcuccu <u>augccggacuuu</u> .....     | 1   | 1 | seq |
| .....uCcuccu <u>augccggacuuu</u> .....      | 1   | 1 | seq |

uaccgggucggaguuagcucaagcgguuaccuccucaugccggacuuucuaucuguccaucucugugcugggguucgagaccgcggggugcuuacugacccuuuuuauugc

|                                       |     |   |     |
|---------------------------------------|-----|---|-----|
| .....uaccuccucaugccggCcuuu.....       | 1   | 1 | seq |
| .....uaccuUcucaugccggacuuuc.....      | 1   | 1 | seq |
| .....uaccuccucaugccggacuuuc.....      | 22  | 0 | seq |
| .....uaGcuccucaugccggacuuuc.....      | 2   | 1 | seq |
| .....uaccuccucaugccUgacuuuc.....      | 1   | 1 | seq |
| .....uaccuccucUgccggacuuuc.....       | 1   | 1 | seq |
| .....uaccuccucaugccggacuuuc.....      | 24  | 0 | seq |
| .....uaccGccucaugccggacuuuc.....      | 3   | 1 | seq |
| .....uaccuccucaugccggacuuucua.....    | 4   | 0 | seq |
| .....uaccuccucaugccUgacuuucuauc.....  | 1   | 1 | seq |
| .....uaccuccucaugccggacuuucuauc.....  | 1   | 0 | seq |
| .....ccuccucaugccggacuuuc.....        | 1   | 0 | seq |
| .....cuccAcaugccggacuu.....           | 1   | 1 | seq |
| .....cucaugccggacGuucua.....          | 1   | 1 | seq |
| .....cucaugccggacuuucuauc.....        | 1   | 0 | seq |
| .....cucaGccggacuuucuaucuguc.....     | 1   | 1 | seq |
| .....uAaugccggacuuucua.....           | 1   | 1 | seq |
| .....ucaugccggacuuucua.....           | 1   | 0 | seq |
| .....ucaugccggacuuucuaG.....          | 1   | 1 | seq |
| .....ucaugccggacuuucuaucugu.....      | 1   | 0 | seq |
| .....ucaugccggacuuucuaucuguc.....     | 1   | 0 | seq |
| .....ucaugccggacuuucuaucuguA.....     | 1   | 1 | seq |
| .....ucaugccggacuuucuaucugucc.....    | 3   | 0 | seq |
| .....caugccggacuuucuaucugucc.....     | 1   | 0 | seq |
| .....caugccggacuuucuaAucugucc.....    | 1   | 1 | seq |
| .....augccggacuuucuaucugucc.....      | 2   | 0 | seq |
| .....Cugccggacuuucuaucugucc.....      | 1   | 1 | seq |
| .....cuguccaucucugugcugggU.....       | 1   | 1 | seq |
| .....guccaucucugugcugggguucgaUac..... | 1   | 1 | seq |
| .....cucugugcugggguucgagacc.....      | 2   | 0 | seq |
| .....cuUugcugggguucgagacc.....        | 1   | 1 | seq |
| .....ugggguucgagaccgcggggu.....       | 1   | 0 | seq |
| .....ggguucgagaccgcggggucua.....      | 1   | 0 | seq |
| .....acccgcggggucuuacugacccuu.....    | 2   | 0 | seq |
| .....cccgcggggucuuacugac.....         | 1   | 0 | seq |
| .....cccgcggggucuuacugacccuuA.....    | 1   | 1 | seq |
| .....cccgcggggucuuacugacccuuu.....    | 1   | 0 | seq |
| .....cgcggggucuuacugacc.....          | 2   | 0 | seq |
| .....cgcggggucuuacuUacc.....          | 1   | 1 | seq |
| .....cgcggggucuuacugaccA.....         | 1   | 1 | seq |
| .....cgcggggucuuacugaccc.....         | 2   | 0 | seq |
| .....cgUgggucuuacugaccc.....          | 1   | 1 | seq |
| .....cgcggggucuuacugacccu.....        | 3   | 0 | seq |
| .....cgcggggucGacugacccu.....         | 1   | 1 | seq |
| .....cgcgCGugcuuacugacccu.....        | 1   | 1 | seq |
| .....cgcggggucuuCugacccu.....         | 1   | 1 | seq |
| .....cgcggggucuuacugacccu.....        | 18  | 0 | seq |
| .....cgcggggAgcuuacugacccu.....       | 1   | 1 | seq |
| .....cgcgggguUcuuacugacccuu.....      | 1   | 1 | seq |
| .....cgcggggGcuuacugacccuu.....       | 1   | 1 | seq |
| .....cgcggggGcuuacugacccuu.....       | 1   | 1 | seq |
| .....cgcggggucuuacugacccuu.....       | 205 | 0 | seq |
| .....cgcggggucuuacugacccuGu.....      | 1   | 1 | seq |
| .....cgcgCGugcuuacugacccuu.....       | 2   | 1 | seq |
| .....cgcgCGugcuuacugacccuu.....       | 1   | 1 | seq |
| .....cgcggggucuuacugacccuA.....       | 5   | 1 | seq |
| .....cgcgUgugcuuacugacccuu.....       | 3   | 1 | seq |
| .....cgUgggucuuacugacccuu.....        | 1   | 1 | seq |
| .....cgcggggucuuCugacccuu.....        | 2   | 1 | seq |
| .....cgcggggucuuacugCccuu.....        | 1   | 1 | seq |
| .....cgcggggucuuacugacccuuuA.....     | 2   | 1 | seq |
| .....cgcgggguUcuuacugacccuu.....      | 1   | 1 | seq |
| .....cgUgggucuuacugacccuuu.....       | 1   | 1 | seq |
| .....cgcggggucuuacugacccuuu.....      | 10  | 0 | seq |
| .....cgcggggucuuacugacccuuuGa.....    | 1   | 1 | seq |
| .....gcggggucuuacugacccuu.....        | 1   | 0 | seq |
| .....ggugcuuacugacccuuuU.....         | 1   | 1 | seq |
| .....guUcuuacugacccuu.....            | 1   | 1 | seq |
| .....gugcuuacugacccuu.....            | 1   | 0 | seq |

hsa-miR-886-3p

hsa-miR-886-5p

uacc**cg**gggucggaguuagcu**caag**cgguuaccuccu**caug**ccggacuucuaucuguccaucucugugcugggguucgagacc**cg**cggggugcuuacug**accc**uuu**aug**c
